# Supplementary material for: Estimation of Equipotent Doses for Anti‐Inflammatory Effects of Prednisolone and AZD9567, an Oral Selective Nonsteroidal Glucocorticoid Receptor Modulator
Source: PubMed Central journal article supplement — CPT Pharmacometrics Syst Pharmacol. 2020 Aug 19;9(8):444–55. doi: 10.1002/psp4.12536 (PMC7438818; doi:10.1002/psp4.12536), 2020-08-19
Supplement: PSP4-9-444-s002.pdf [file PSP4-9-444-s002.pdf]

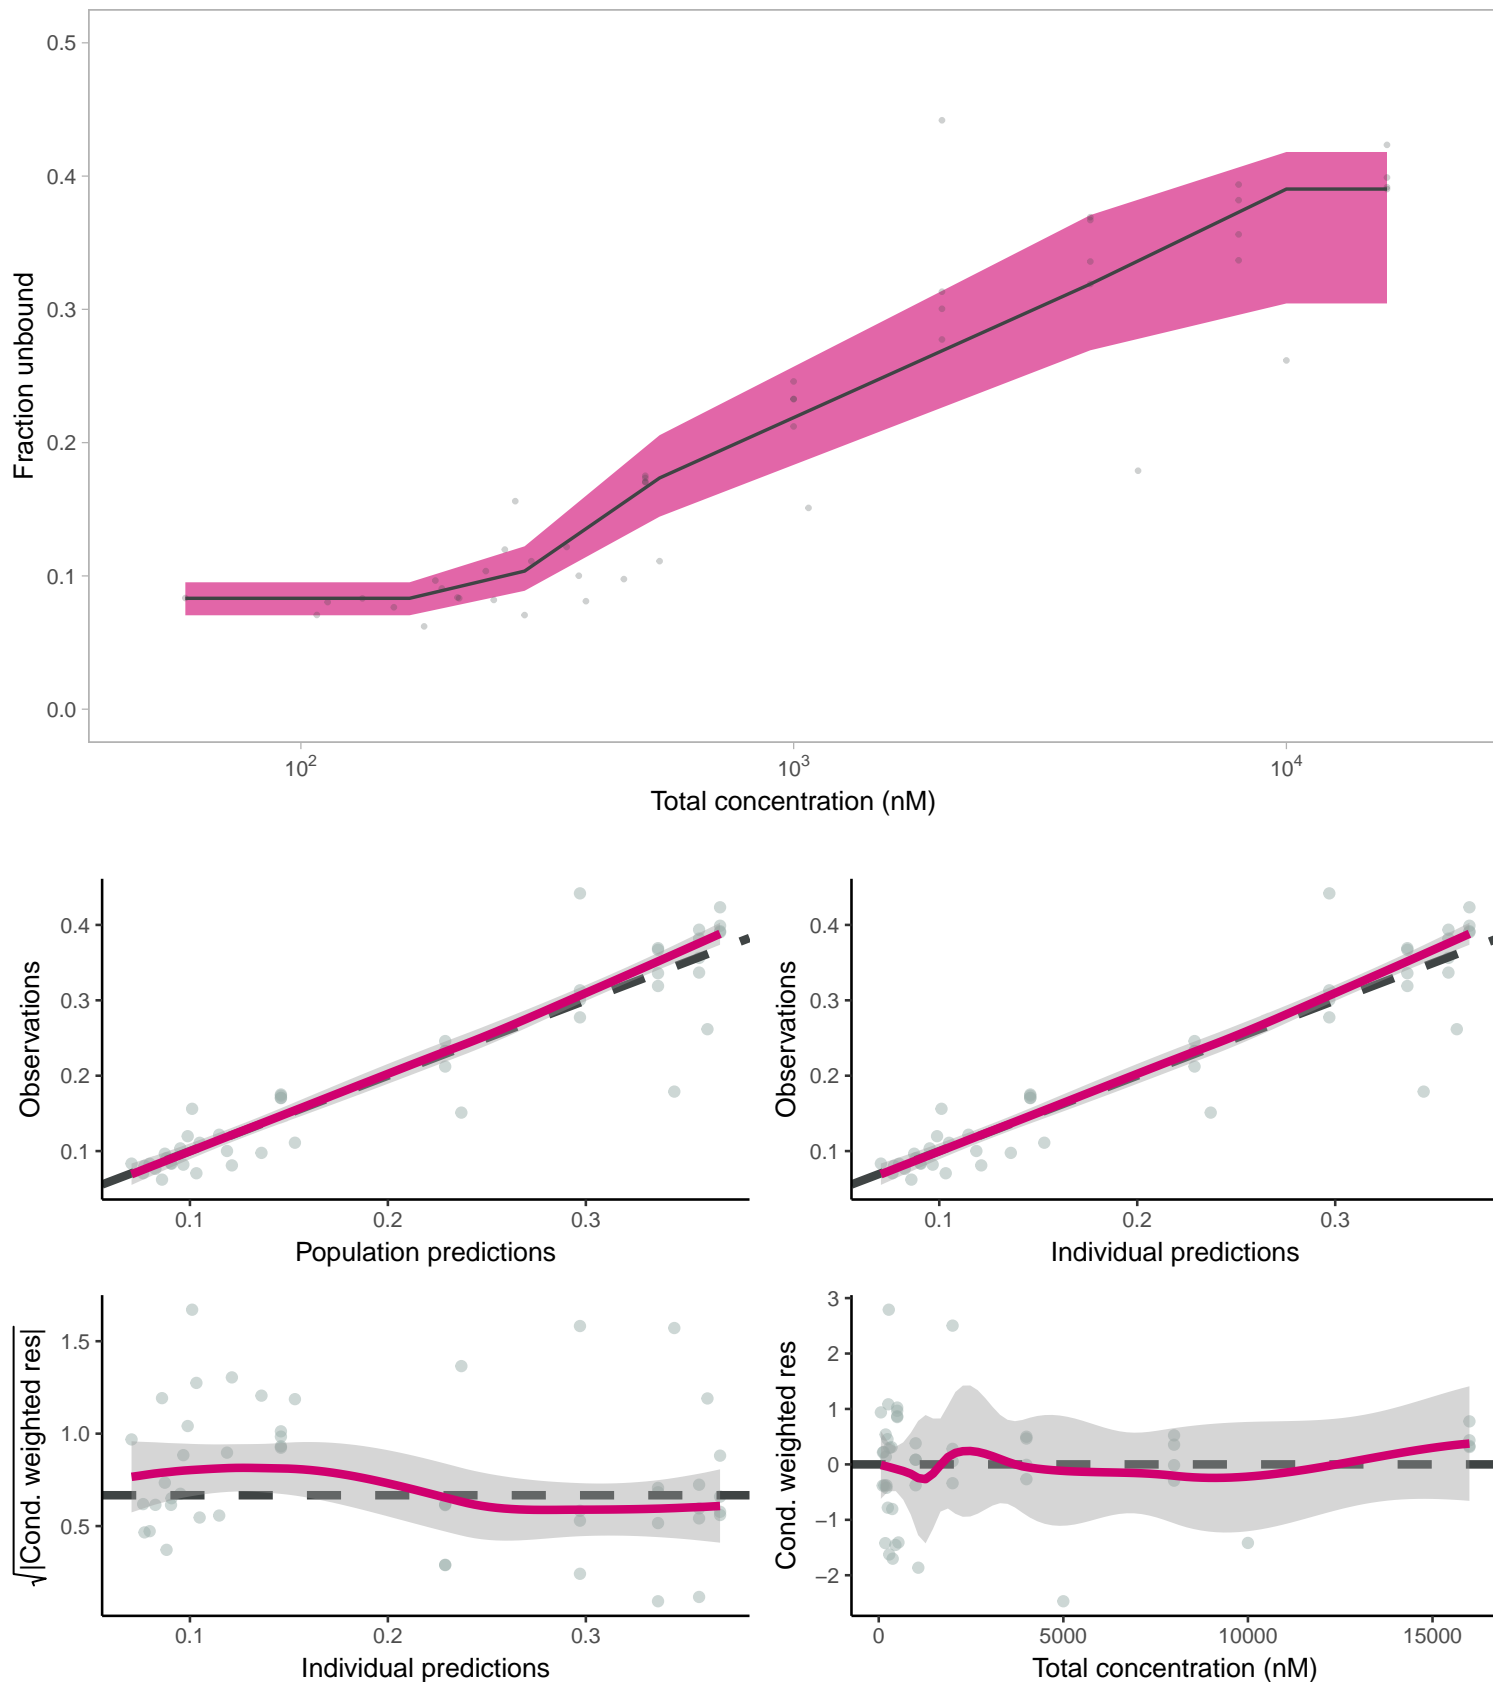

**Figure S2. Diagnostic plots for the prednisolone unbound fraction model.** Upper panel shows a VPC with 95% confidence interval for the median of the model predictions (red), the median of the observed data (solid black line), and individual data (gray dots). Middle panels show observations versus population predictions (left) and versus individual predictions (right). Lower panels show the magnitude of conditional weighted residuals versus individual predictions (left) and conditional weighted residuals versus total concentration (right).
