# Supplementary material for: Estimation of Equipotent Doses for Anti‐Inflammatory Effects of Prednisolone and AZD9567, an Oral Selective Nonsteroidal Glucocorticoid Receptor Modulator
Source: PubMed Central journal article supplement — CPT Pharmacometrics Syst Pharmacol. 2020 Aug 19;9(8):444–55. doi: 10.1002/psp4.12536 (PMC7438818; doi:10.1002/psp4.12536), 2020-08-19
Supplement: PSP4-9-444-s003.pdf [file PSP4-9-444-s003.pdf]

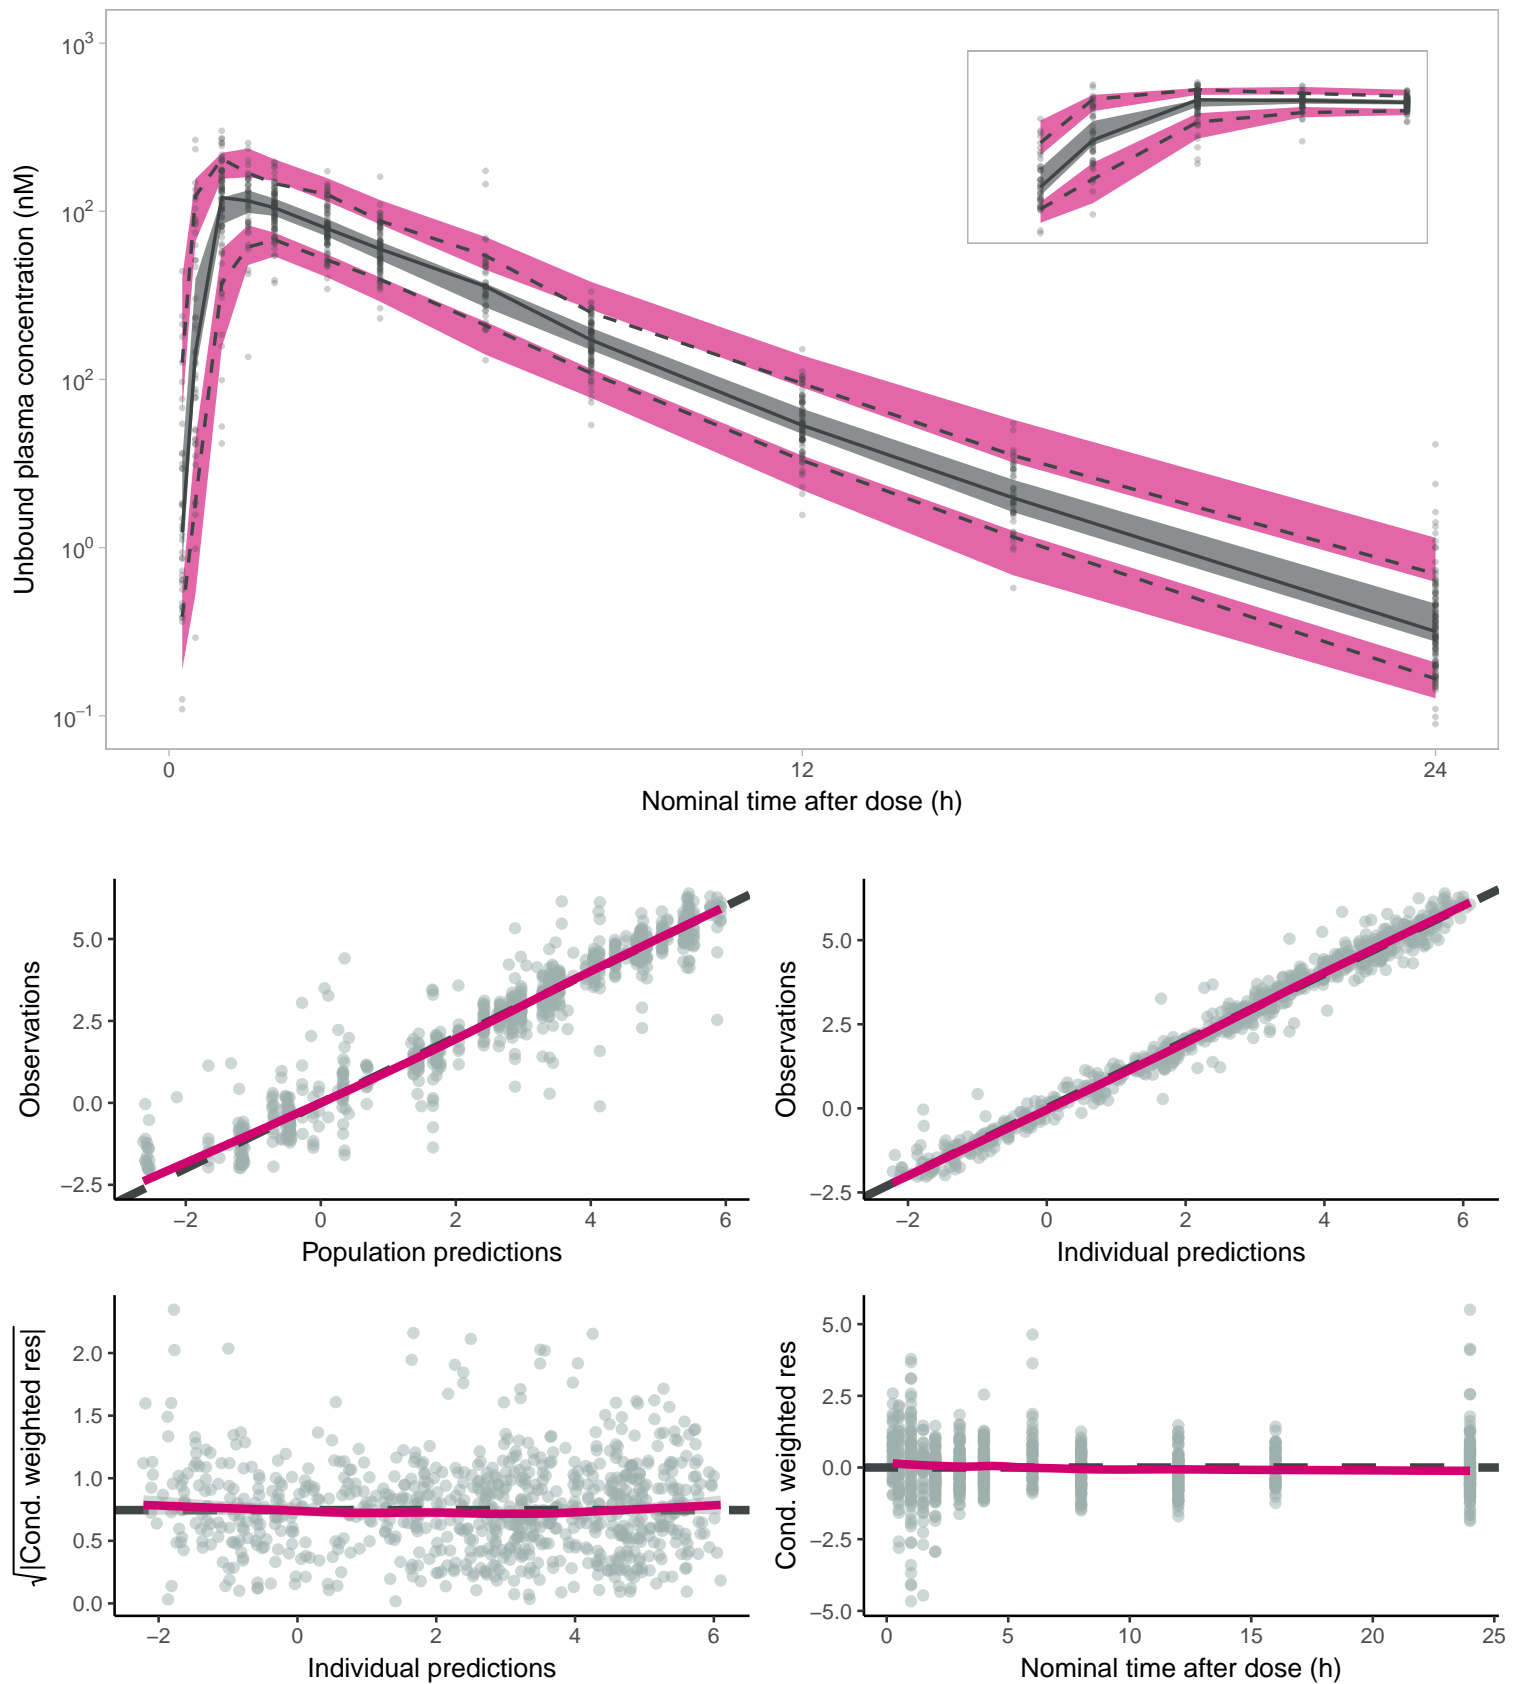

**Figure S3. Diagnostic plots for the prednisolone PK model.** Upper panel shows a prediction-corrected VPC with 95% confidence intervals for the 10th, 50th, and 90th percentiles (red, gray, red) of the model predictions, the corresponding percentiles of the observed data (dashed, solid, and dashed lines), and individual data (gray dots). The inset shows a magnification during the first 2 h after dose. Middle panels show observations versus population predictions (left) and versus individual predictions (right). Lower panels show the magnitude of conditional weighted residuals versus individual predictions (left) and conditional weighted residuals versus nominal time after dose (right).
