# Supplementary material for: Estimation of Equipotent Doses for Anti‐Inflammatory Effects of Prednisolone and AZD9567, an Oral Selective Nonsteroidal Glucocorticoid Receptor Modulator
Source: PubMed Central journal article supplement — CPT Pharmacometrics Syst Pharmacol. 2020 Aug 19;9(8):444–55. doi: 10.1002/psp4.12536 (PMC7438818; doi:10.1002/psp4.12536), 2020-08-19
Supplement: PSP4-9-444-s004.pdf [file PSP4-9-444-s004.pdf]

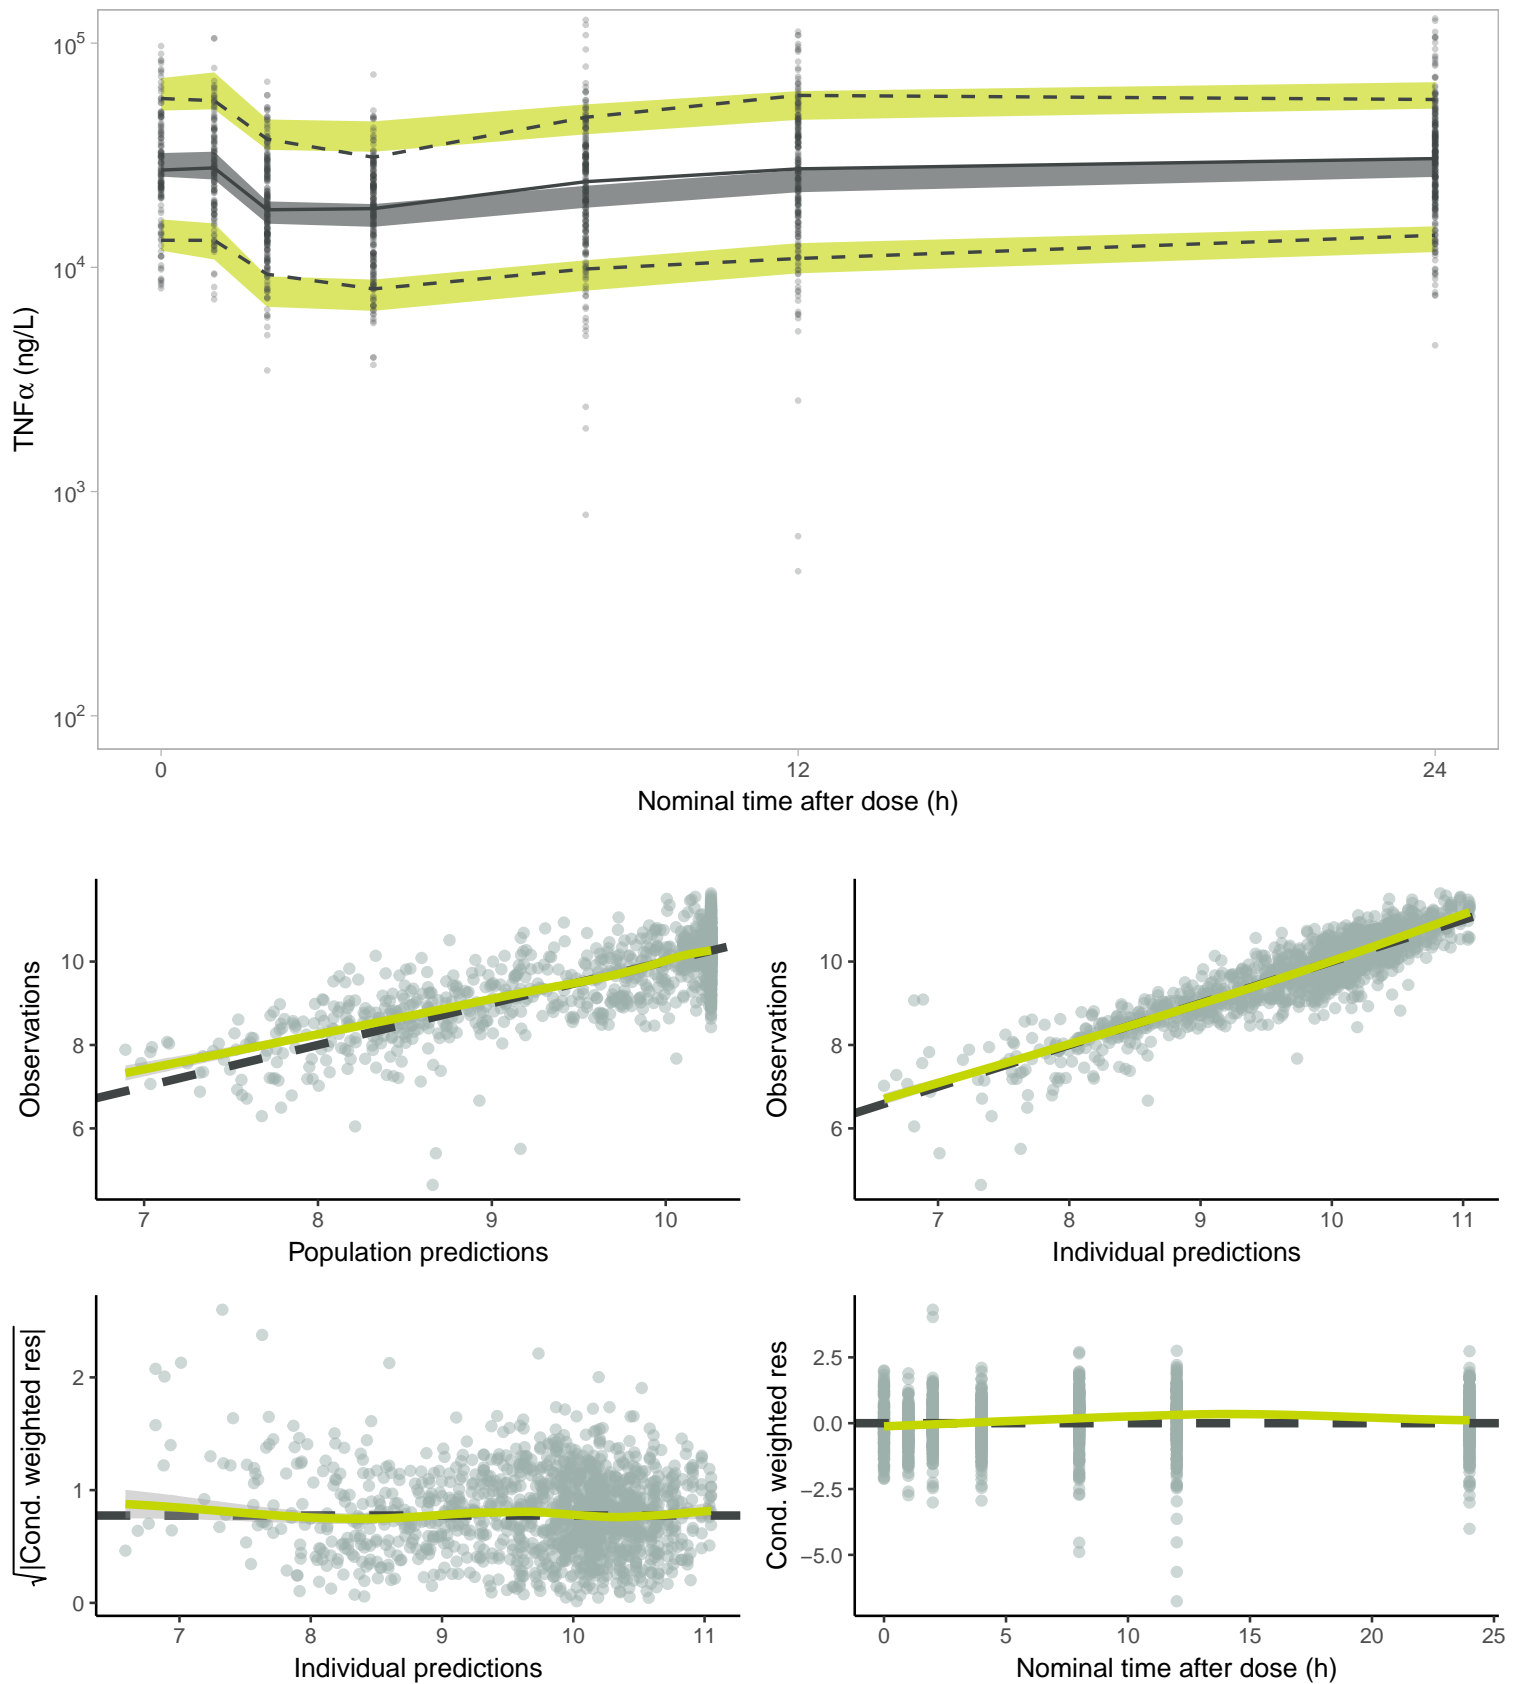

**Figure S4. Diagnostic plots for the TNF $\alpha$  PKPD model.** Upper panel shows a prediction-corrected VPC with 95% confidence interval for the 10th, 50th, and 90th percentiles (green, gray, green) of the model predictions, the corresponding percentiles of the observed data (dashed, solid, and dashed lines), and individual data (gray dots). Middle panels show observations versus population predictions (left) and versus individual predictions (right). Lower panels show the magnitude of conditional weighted residuals versus individual predictions (left) and conditional weighted residuals versus nominal time after dose (right).
